# Supplementary material
Source: publisher figshare collection journal article supplement (https://gsajournals.figshare.com/ndownloader/files/24115832)
Supplement: Supplementary file 1 [file 24115832]

## Sheet: Sheet1
	Table S2 Completeness of conifer genome assemblies assessed with BUSCOv3.0.2
	Taxon	Sequoiadendron giganteum	Picea glauca	Picea abies	Pinus lambertiana	Pinus taeda	Pseudotsuga menziesii
		Giant sequoia	White spruce	Norway spruce	Sugar pine	Loblolly pine	Doug fir
	Reference		Warren et al., 2015	Nystedt et al., 2013	Stevens et al., 2016	Neale et al., 2014	Neale et al., 2017
	Complete BUSCOs (C)	564	443	505	396	636	484
	Complete and single-copy BUSCOs (S)	519	316	434	349	508	412
	Complete and duplicated BUSCOs (D)	46	127	71	47	128	72
	Fragmented BUSCOs (F)	136	182	150	172	102	110
	Missing BUSCOs (M)	740	815	785	872	702	846
	Total BUSCO groups searched	1440	1440	1440	1440	1440	1440
	Percentage found	0.3786	0.3076	0.3507	0.275	0.4417	0.3361
